# Supplementary material
Source: publisher figshare collection journal article supplement (https://sage.figshare.com/ndownloader/files/12785894)
Supplement: Supplementary file 1 [file 12785894]

## Interview Guide

### Start-up questions

- What did you think of the project before it commenced, when you first heard about it?
- Who introduced the project in the department?
- What do you think about the project now?
- What has changed? (why?)

### The WHO-HPH Recognition Process elements

1. Were you involved in the Medical Record Audit?
  - If yes, how did you do it?
  - If yes, how was it? (Was it easy or hard?)
2. Were you involved in the Patient Survey?
  - If yes, how did you do it?
  - If yes, how was it? (Was it easy or hard?)
3. Were you involved in the Staff Survey?
  - If yes, how did you do it?
  - If yes, how was it? (Was it easy or hard?)
4. Were you involved in completing the Organizational Data Form?
  - If yes, how did you do it?
  - If yes, how was it? (Was it easy or hard?)
5. Were you involved in drafting the Quality Plan?
  - If yes, how did you do it?
  - If yes, how was it? (Was it easy or hard?)

### Overall, what do you think of the 5 elements?

#### Implementation.

1. Were you involved in the implementation?
  - If yes, how did you do it?
  - If yes, how was it? (Was it easy or hard?)

#### Overall Reflections.

- What, if anything, has your department gained from the project?
- Will you continue the introduced “quality management loop”?
- Personal learnings?
- Recommendations for others?
- Do you have any recommendations for improving the project?

**Interested in receiving project info?**

**Is there anything else that we haven’t touched upon or something further you think we should discuss?**
